# Supplementary material for: Skeletal progenitors preserve proliferation and self-renewal upon inhibition of mitochondrial respiration by rerouting the TCA cycle
Source: PubMed Central journal article supplement — Cell Rep. 2022 Jul 28;40(4):111105. doi: 10.1016/j.celrep.2022.111105 (PMC9380255; doi:10.1016/j.celrep.2022.111105), 2022-07-28
Supplement: mmc1.pdf [file mmc1.pdf]

**Cell Reports, Volume 40**

**Supplemental information**

**Skeletal progenitors preserve proliferation  
and self-renewal upon inhibition of mitochondrial  
respiration by rerouting the TCA cycle**

**Guillaume Tournaire, Shauni Loopmans, Steve Stegen, Gianmarco Rinaldi, Guy Eelen, Sophie Torrekens, Karen Moermans, Peter Carmeliet, Bart Ghesquière, Bernard Thienpont, Sarah-Maria Fendt, Nick van Gestel, and Geert Carmeliet**

**Figure S1**

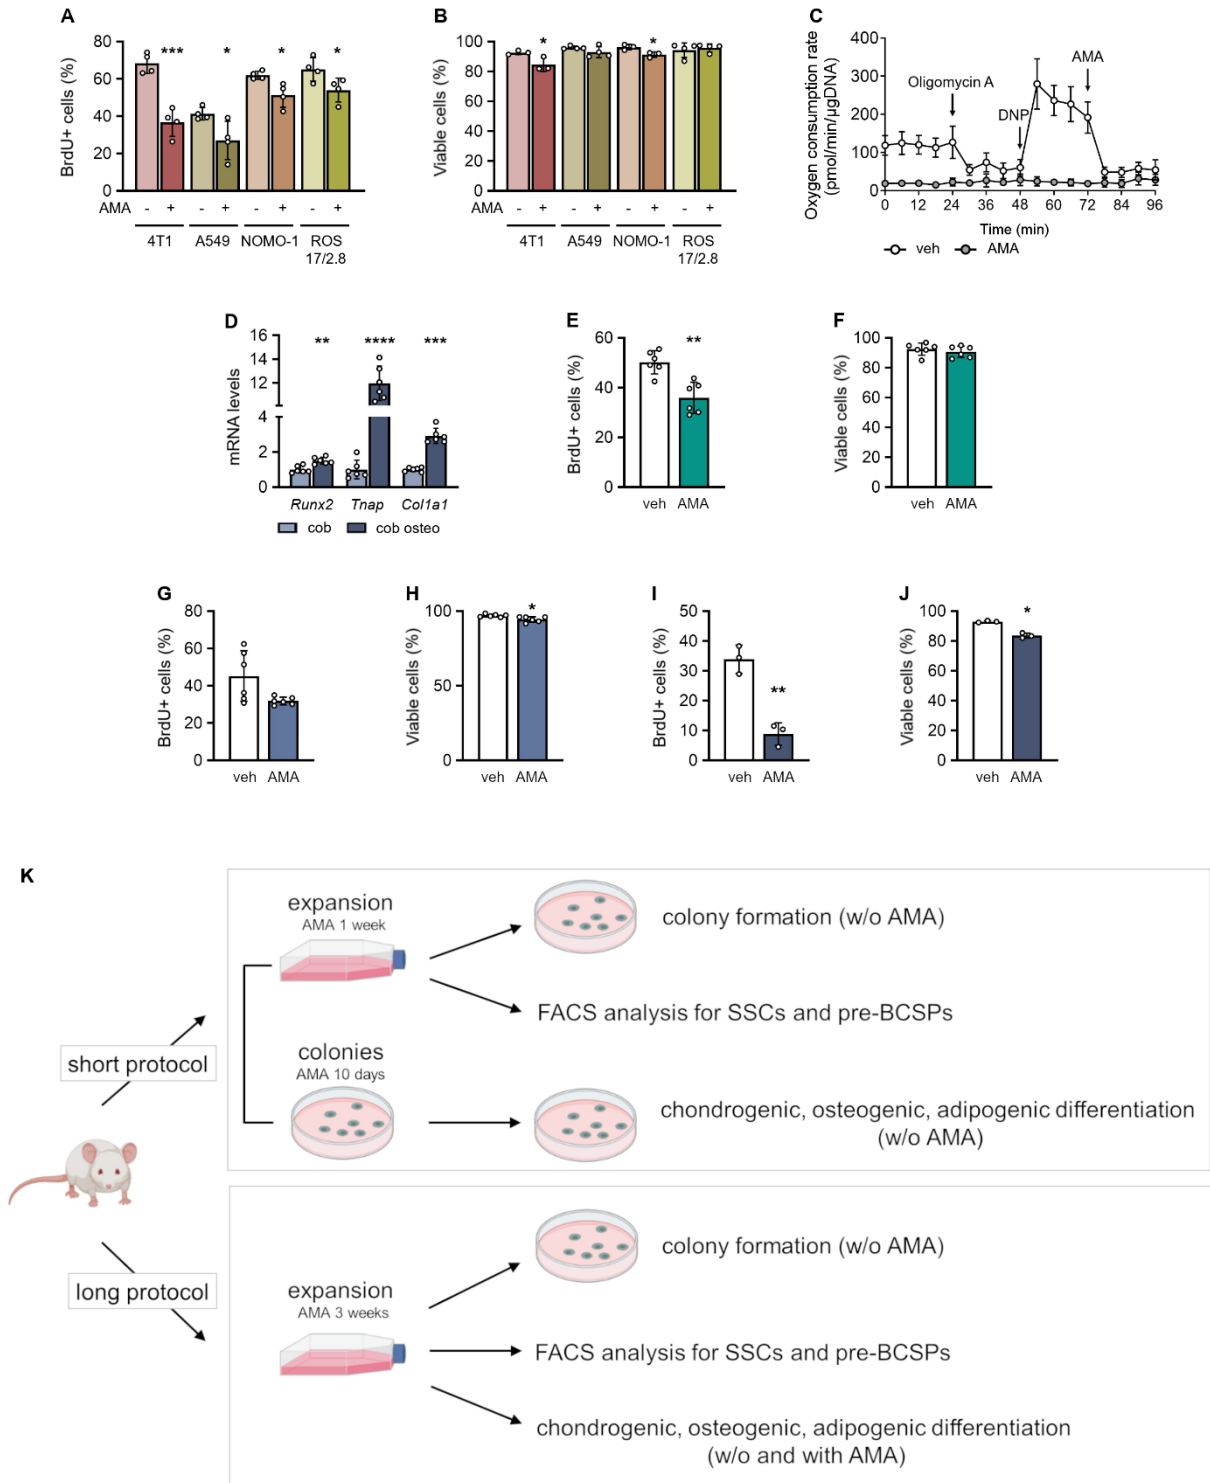

**Figure S1. Effect of AMA on tumor cell lines and periosteal cells and strategy to investigate the effect of AMA on SSPC properties, related to Figure 1.**

(A) Flow cytometry analysis of BrdU positive (BrdU<sup>+</sup>) 4T1, A549, NOMO-1 and ROS 17/2.8 cancer cells treated with vehicle (veh) or 10 $\mu$ M Antimycin A (AMA) for 7 days (n=4).

(B) Cell viability, using Annexin V-Propidium Iodide flow cytometry, of 4T1, A549, NOMO-1 and ROS 17/2.8 cancer cells treated with veh or AMA for 7 days (n=3-4).

(C) Oxygen consumption rate in veh- and AMA-treated mouse periosteal cells (2,4-dinitrophenol, DNP; n=3).

(D) Culturing calvarial osteoblasts (cob) for 3 days in osteogenic differentiation medium (cob osteo) results in mature osteoblasts, assessed by quantification of *Runx2*, *Tnap* and *Colla1* mRNA levels (n=6).

(E) Flow cytometry analysis of BrdU<sup>+</sup> growth plate chondrocytes treated with veh or 10 $\mu$ M AMA for 24h (n=6).

(F) Cell viability, using Annexin V-Propidium Iodide flow cytometry, of growth plate chondrocytes treated with veh or AMA for 24h (n=6).

(G) Flow cytometry analysis of BrdU<sup>+</sup> calvarial cells treated with veh or AMA for 24h (n=6).

(H) Cell viability, using Annexin V-Propidium Iodide flow cytometry, of calvarial cells treated with veh or AMA for 24h (n=6).

(I) Flow cytometry analysis of BrdU<sup>+</sup> mature osteoblasts (cob osteo) treated with veh or 10 $\mu$ M AMA for 24h (n=3).

(J) Cell viability, using Annexin V-Propidium Iodide flow cytometry, of mature osteoblasts (cob osteo) treated with veh or AMA for 24h (n=3).

(K) Schematic representation of experimental design to investigate SSPC properties. The effect of AMA treatment on SSPC properties was determined using a short or long protocol. In the short protocol, periosteal cells were expanded for 1 week with vehicle or AMA and their capacity to form colonies, in the absence of AMA, as well as the percentage of skeletal stem cells (SSCs) and pre-bone, cartilage and stromal progenitors (pre-BCSPs) was investigated. In parallel, freshly isolated cells were seeded at clonal density and treated with AMA for 10 days. AMA treatment was stopped and colonies were further cultured in medium inducing chondrogenic, osteogenic or adipogenic differentiation to investigate their tri-lineage potential.

In the long protocol, we expanded cells for 3 weeks, corresponding to 3 passages, with vehicle or AMA and analyzed their capacity to form colonies, the percentage of SSCs and pre-BCSPs and their tri-lineage differentiation potency in the presence or absence of AMA.

Data are means  $\pm$  SD. \*p<0.05, \*\*p<0.01, \*\*\*p<0.001, \*\*\*\*p<0.0001 vs veh (two-tailed Student's *t*-test).

**Figure S2**

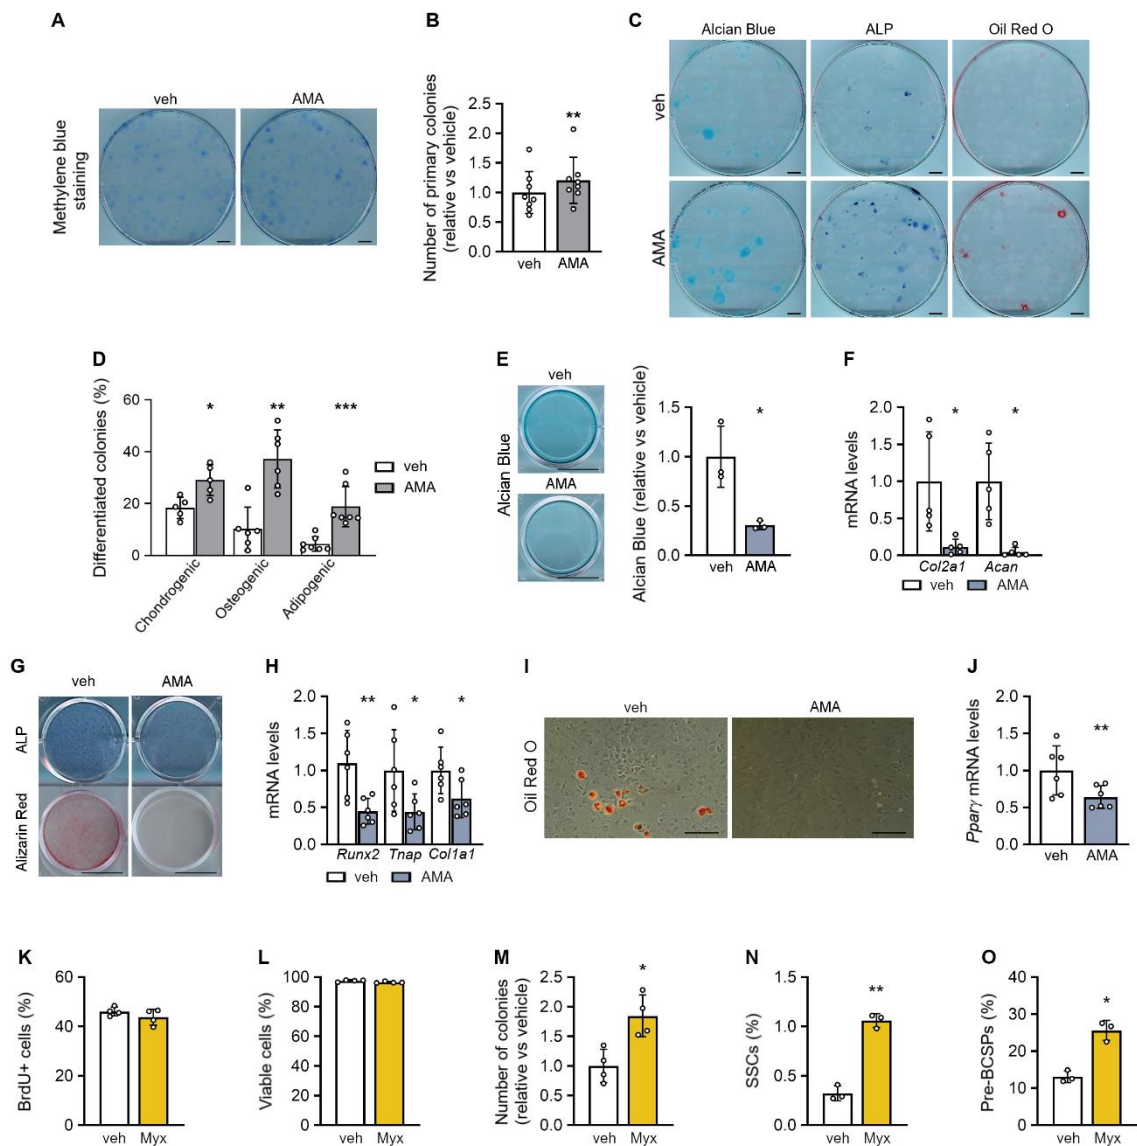

**Figure S2. AMA treatment during expansion of SSPCs preserves their multilineage potential, but has negative effects when used during differentiation, related to Figure 1.**

(A and B) Visualization (A, Methylene blue staining) and quantification of the number of colonies formed after culture of SSPCs with vehicle (veh; control) or 10 μM Antimycin A (AMA) for 10 days (B, n=8).

(C and D) Visualization of chondrogenic, osteogenic and adipogenic differentiation of colonies (C) and quantification of the number of colonies (D) staining positive respectively for the presence of chondrogenic matrix (Alcian blue; n=5), alkaline phosphatase activity (ALP; n=6) or lipid deposits (Oil Red O; n=7). Colonies were formed in the presence of veh or AMA, but differentiated in the absence of AMA.

(E and F) Chondrogenic differentiation in the presence of veh (control) or AMA, assessed by visualization and quantification of chondrogenic matrix deposition (Alcian blue staining) (E; n=3) and quantification of *Col2a1* and *Acan* mRNA levels (F; n=5).

(G and H) Osteogenic differentiation in the presence of veh or AMA, assessed by visualization of alkaline phosphatase activity (ALP) and mineralized matrix deposition (Alizarin red staining) (G; n=3) and quantification of *Runx2*, *Tnap*, *Col1a1* mRNA levels (H; n=6).

(I and J) Adipogenic differentiation in the presence of veh or AMA, assessed by visualization of lipid deposits (Oil Red O staining) (I; n=4) and quantification of *Pparγ* mRNA levels (J; n=6).

(K) Flow cytometry analysis of BrdU+ SSPCs treated with veh or 10 μM Myxothiazol (Myx) for 7 days (n=4).

(L) Cell viability, using Annexin V-Propidium Iodide flow cytometry, of SSPCs treated with veh or Myx (n=4).

(M) Number of colonies formed after culture of SSPCs with veh (control) or Myx (n=4).  
(N and O) Flow cytometry analysis of the percentage of skeletal stem cells (SSCs, N) and pre-bone, cartilage and stromal progenitors (pre-BCSPs, O) in veh- or Myx-treated cells (n=3).  
Data are means  $\pm$  SD. \*p<0.05, \*\*p<0.01, \*\*\*p<0.001 vs veh (paired two-tailed Student's *t*-test). Scale bar in A, C, E, G: 1 cm; in I: 200  $\mu$ m.

**Figure S3**

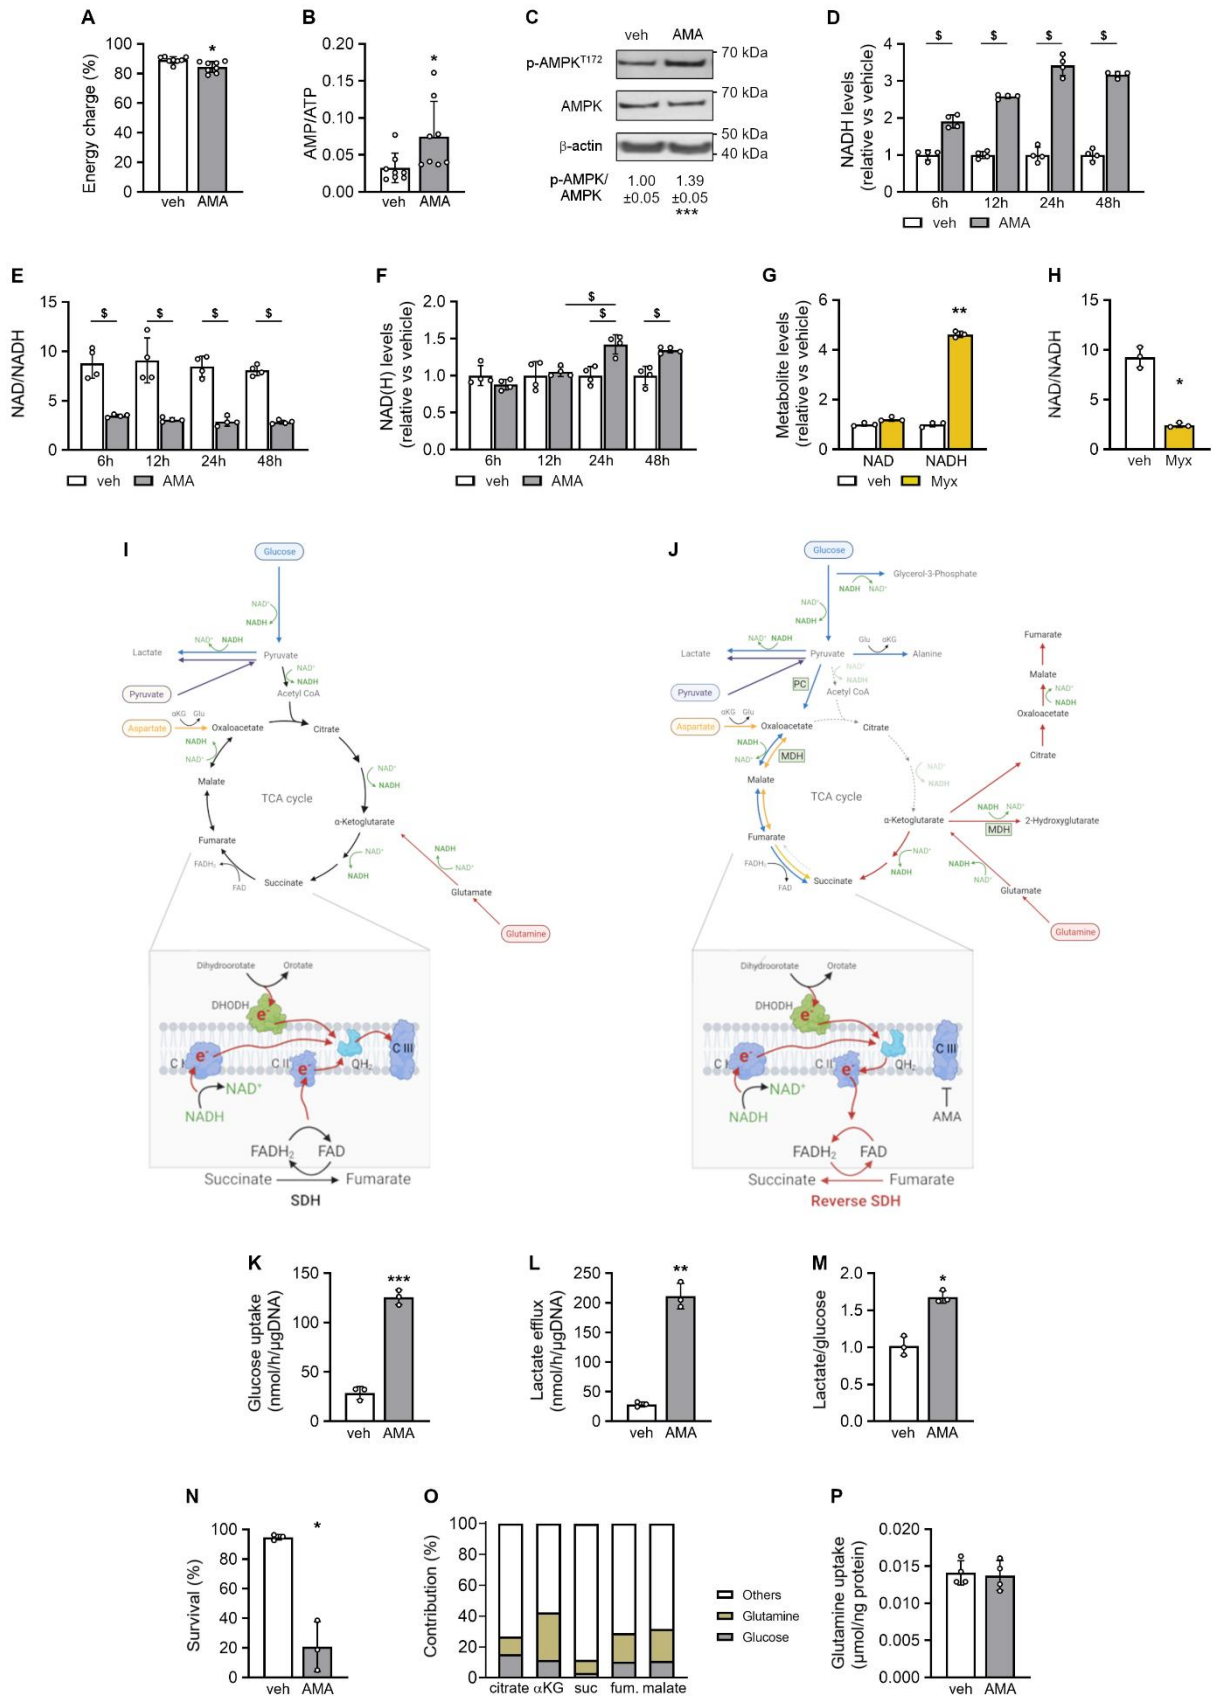

**Figure S3. SSPCs are in energy stress despite increased glycolysis and they increase the NAD(H) pool to preserve proliferation upon ETC inhibition, related to Figure 2.**

(A and B) Energy charge calculated as  $([ATP] + \frac{1}{2} [ADP]) / ([ATP] + [ADP] + [AMP])$  (A; n=8) and AMP to ATP ratio (B; n=8) in cells treated with vehicle (veh) or 10 $\mu$ M Antimycin A (AMA).

(C) Immunoblot of p-AMPK<sup>T172</sup>, AMPK, and  $\beta$ -actin with quantification of p-AMPK<sup>T172</sup> to AMPK ratio in veh- and AMA-treated cells. Representative images of 3 experiments are shown.

(D-F) NADH levels (D; n=4), NAD/NADH ratio (E; n=4) and NAD + NADH (NAD(H)) levels (F; n=4) in cells treated with veh (control) or AMA for indicated time points.

(G and H) NAD and NADH levels (G; n=3) and NAD/NADH ratio (H; n=3) in cells treated with veh (control) or 10 $\mu$ M Myxothiazol (Myx) for 3 days.

(I) Schematic representation showing pathways that produce NADH in veh-treated cells or that regenerate NAD<sup>+</sup> by converting pyruvate to lactate and by transferring electrons (e<sup>-</sup>) to the electron transfer chain (ETC). (DHODH: dihydroorotate dehydrogenase; C I: complex I of ETC; C II: complex II; C III: complex III; QH<sub>2</sub>: ubiquinol; SDH: succinate dehydrogenase)

(J) Schematic representation showing metabolic adaptations in AMA-treated cells: pathways producing NADH are downregulated, including pyruvate dehydrogenase (PDH) and the conversion of citrate to  $\alpha$ -ketoglutarate in the TCA cycle, while pathways that can regenerate NAD<sup>+</sup> are stimulated, including the conversion of glucose to glycerol-3-phosphate, of  $\alpha$ -Ketoglutarate to 2-Hydroxyglutarate and of Oxaloacetate to Malate. In addition, reverse SDH activity allows that electrons are still transferred from C I and DHODH to QH<sub>2</sub>. Thin dashed arrows indicate downregulation (Glu: Glutamate;  $\alpha$ KG,  $\alpha$ -Ketoglutarate; MDH: malate dehydrogenase).

(K-M) Glucose uptake (K; n=3), lactate efflux (L; n=3) and ratio of lactate efflux to glucose uptake (M; n=3) in veh- and AMA-treated cells.

(N) Cell viability of veh- and AMA-treated cells cultured for 24h in glucose-deprived medium (0,5mM) and analyzed by Annexin V-Propidium Iodide flow cytometry (n=3).

(O) Fractional contribution of <sup>13</sup>C<sub>5</sub>-glutamine and <sup>13</sup>C<sub>6</sub>-glucose to citrate,  $\alpha$ KG, succinate (suc), fumarate (fum) and malate in periosteal cells (n=8).

(P) Consumption of glutamine during 24h by veh- and AMA-treated cells (n=4).

Data are means  $\pm$  SD. \*p<0.05, \*\*p<0.01, \*\*\*p<0.001 vs veh (paired two-tailed Student's *t*-test), \$p<0.05 (two-way ANOVA).

**Figure S4**

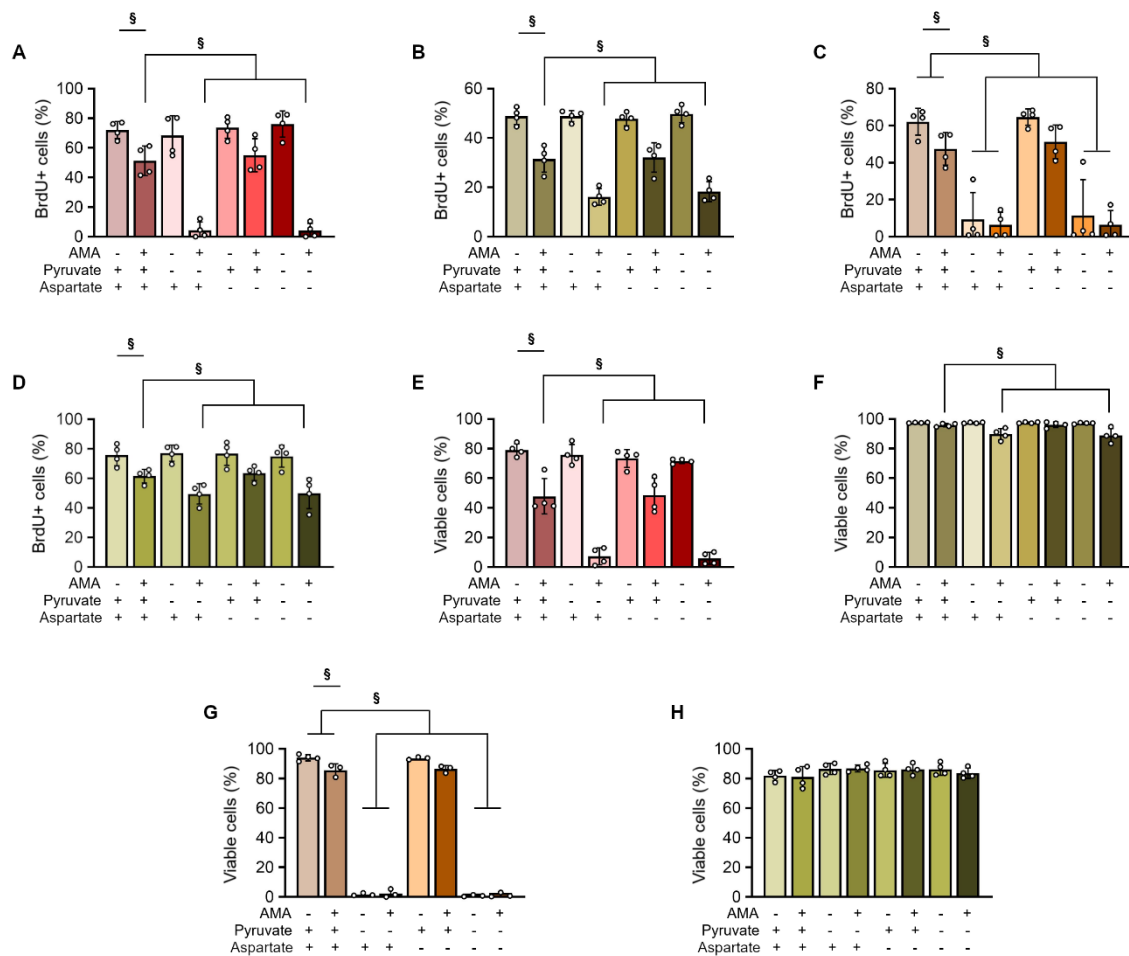

**Figure S4. Tumor cells rely on pyruvate upon AMA-treatment, related to Figure 3.**

(A-D) Flow cytometry analysis of BrdU positive (BrdU<sup>+</sup>) 4T1 (A; n=4), A549 (B; n=4), NOMO-1 (C; n=4) and ROS 17/2.8 (D; n=4) cancer cells treated with vehicle (veh) or 10µM Antimycin A (AMA) for 7 days and then for 24h in medium with 1mM pyruvate and 0.22mM aspartate or without pyruvate and/or aspartate.

(E-H) Cell viability, using Annexin V-Propidium Iodide flow cytometry, of 4T1 (E; n=4), A549 (F; n=4), NOMO-1 (G; n=3) and ROS 17/2.8 (H; n=4) cancer cells treated with veh or 10µM AMA for 7 days and then for 24h in medium with 1mM pyruvate and 0.22mM aspartate or without pyruvate and/or aspartate.

Data are means ± SD. §p<0.05 (three-way ANOVA).



**Figure S5**

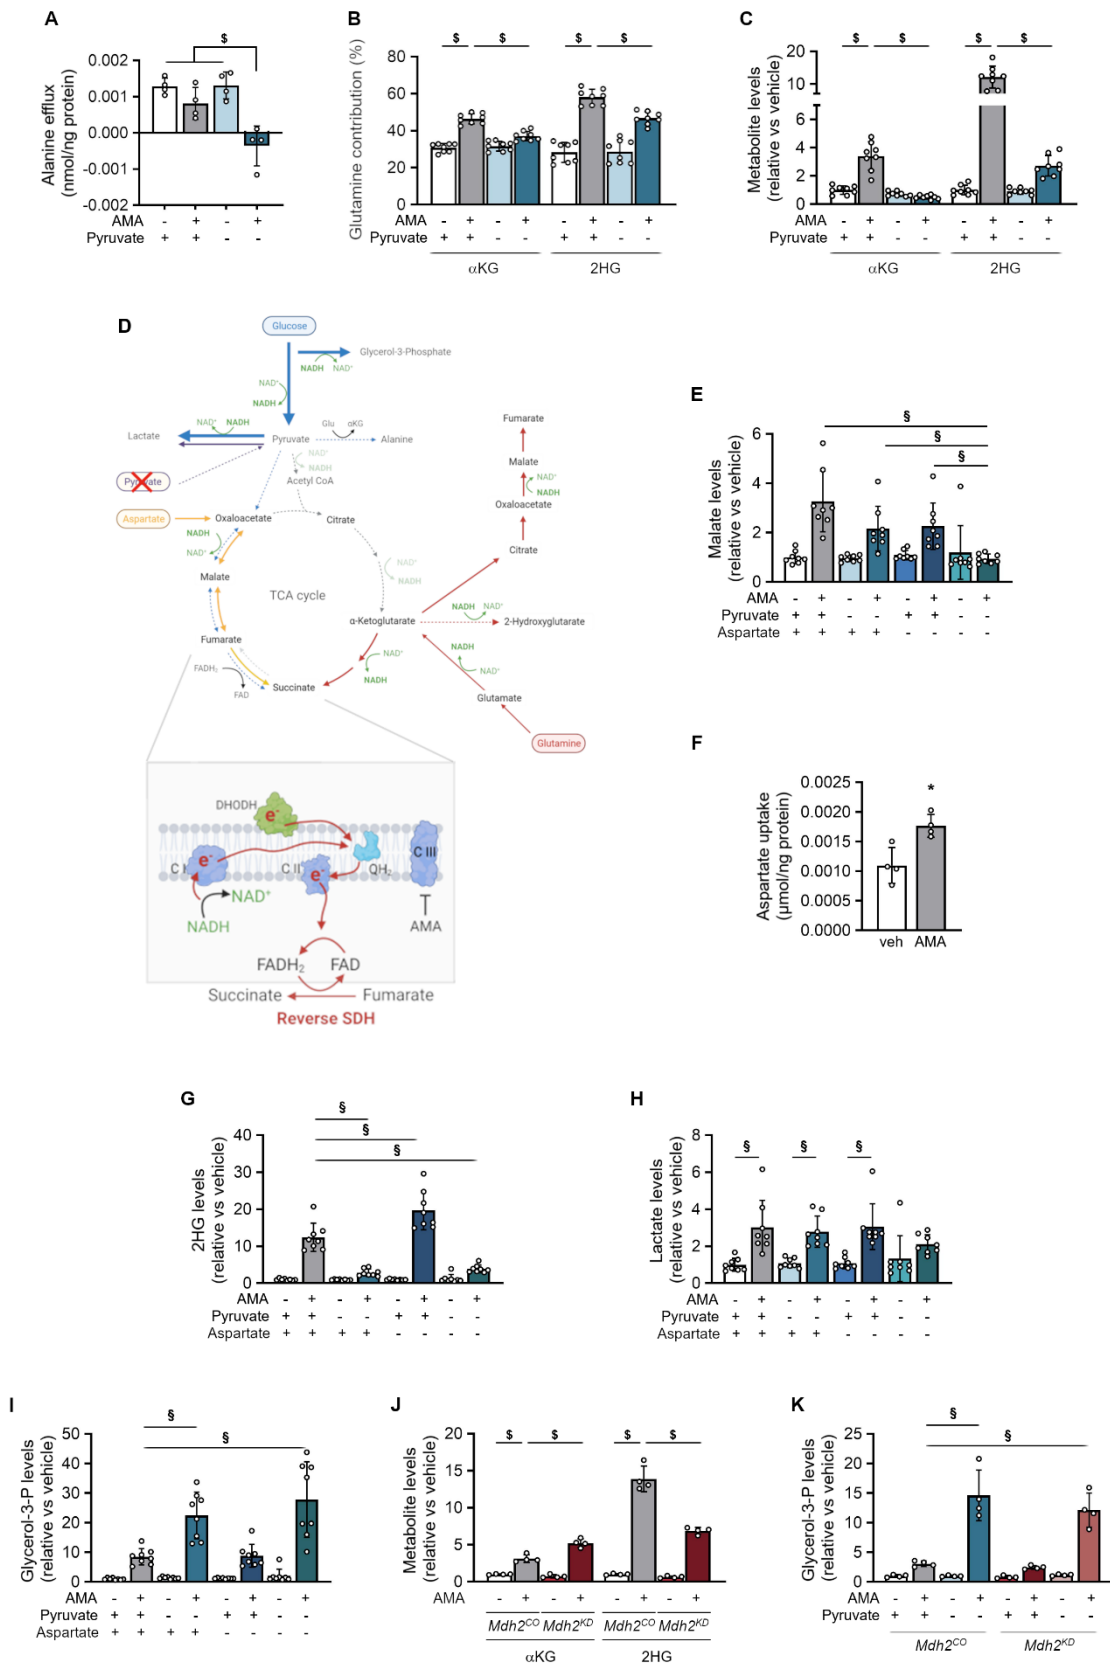

**Figure S5: Extracellular pyruvate and aspartate promote NAD<sup>+</sup> regeneration, related to Figure 3.**

- (A) Alanine efflux during 24h by cells treated with vehicle (veh) or 10 $\mu$ M Antimycin A (AMA) (n=4)
- (B) Fractional contribution of <sup>13</sup>C<sub>5</sub>-glutamine to  $\alpha$ -ketoglutarate ( $\alpha$ KG) and 2-hydroxyglutarate (2HG) in veh- and AMA-treated cells cultured with or without 1mM pyruvate (n=8)
- (C)  $\alpha$ KG and 2HG levels in veh (control)- and AMA-treated cells cultured with or without pyruvate (n=8).
- (D) Schematic representation of metabolic adaptations in AMA-treated cells cultured in pyruvate-deprived condition. Pyruvate deprivation decreases the contribution of glucose to malate and the conversion of glucose to alanine, thereby reducing the production of  $\alpha$ KG and indirectly of 2HG, which could affect NAD<sup>+</sup> regeneration. NAD<sup>+</sup> levels are nevertheless maintained by increased glucose contribution to glycerol-3-phosphate (glycerol-3-P). Thick arrows indicate upregulation, thin dashed arrows downregulation.
- (E) Malate levels in veh (control)- and AMA-treated cells cultured in medium with 1mM pyruvate and 0.22mM aspartate or without pyruvate and/or aspartate (n=8).
- (F) Aspartate consumption during 24h by veh- and AMA-treated cells (n=4).
- (G-I) 2HG (G), Lactate (H) and glycerol-3-P(I) levels in veh (control)- and AMA-treated cells cultured in medium with 1mM pyruvate and 0.22mM aspartate or without pyruvate and/or aspartate (n=8).
- (J)  $\alpha$ KG and 2HG levels in veh (control)- and AMA-treated cells transduced with control (*Mdh2<sup>CO</sup>*) or MDH2-specific shRNA (*Mdh2<sup>KD</sup>*) (n=4).
- (K) Glycerol-3-P levels in veh (control)- and AMA-treated *Mdh2<sup>CO</sup>* and *Mdh2<sup>KD</sup>* cells cultured with or without pyruvate (n=4).
- Data are means  $\pm$  SD. \*p<0.05 (paired two-tailed Student's *t*-test), §p<0.05 (two-way ANOVA), §p<0.05 (three-way ANOVA).

**Figure S6**

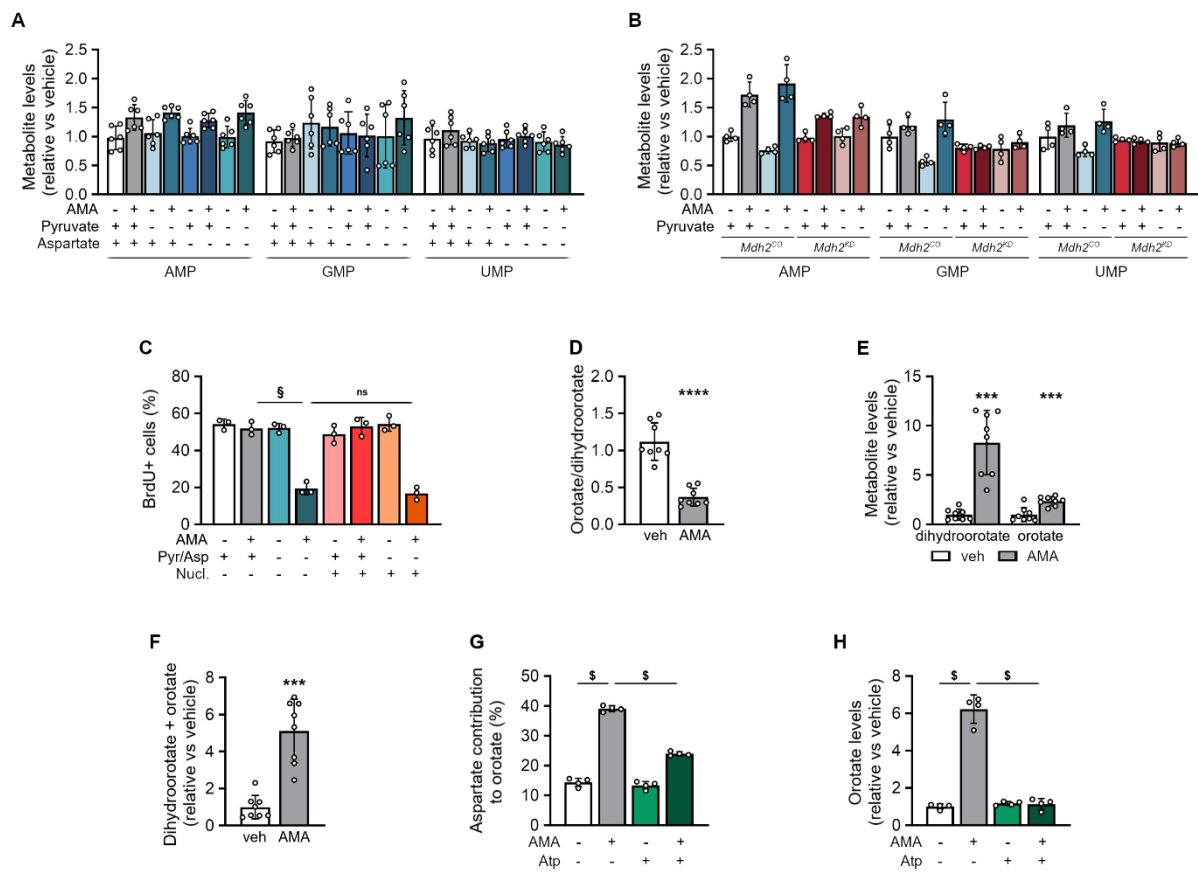

**Figure S6. DHODH activity is preserved allowing pyrimidine synthesis, related to Figure 3.**

(A and B) AMP, GMP and UMP levels in cells treated with vehicle (veh; control) or 10 $\mu$ M Antimycin A (AMA), cultured in medium with 1mM pyruvate and 0.22mM aspartate or without pyruvate and/or aspartate (A; n=6) or in veh- and AMA-treated cells transduced with control (*Mdh2<sup>CO</sup>*) or MDH2-specific shRNA (*Mdh2<sup>KD</sup>*) and cultured with or without pyruvate (B; n=4).

(C) Flow cytometry analysis of BrdU positive (BrdU<sup>+</sup>) cells, treated with veh or AMA and cultured in full or pyruvate/aspartate (Pyr/Asp)-deprived medium supplemented or not with nucleosides (Nucl. n=3).

(D-F) Orotate to dihydroorotate ratio (D; n=8), dihydroorotate and orotate levels (E; n=8) and dihydroorotate + orotate pool (F; n=8) in veh (control)- and AMA-treated cells.

(G and H) Fractional contribution of <sup>13</sup>C<sub>4</sub>-aspartate to orotate (H; n=4) and orotate levels (I; n=4) in cells treated with veh (control), 10 $\mu$ M AMA and/or 500nM Atpenin A5 for 3 days.

Data are means  $\pm$  SD. \*\*\*p<0.001, \*\*\*\*p<0.0001 vs veh (paired two-tailed Student's *t*-test), ns is not significant; §p<0.05 (two-way ANOVA), §p<0.05 (three-way ANOVA).

**Figure S7**

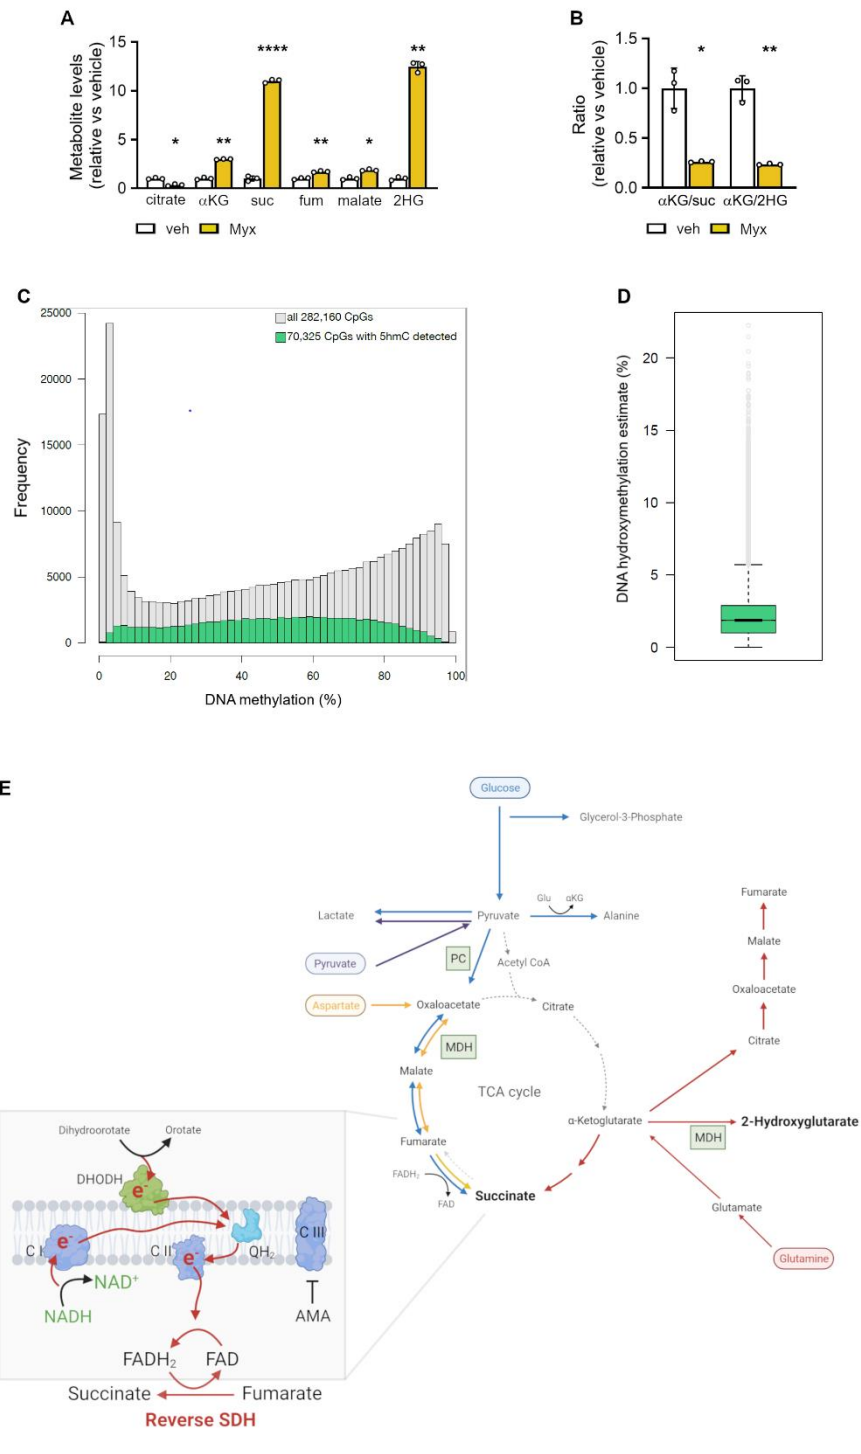

**Figure S7: Altered metabolite levels affect DNA demethylation, related to Figure 5.**

(A and B) Citrate,  $\alpha$ -ketoglutarate ( $\alpha$ KG) succinate (suc), fumarate (fum), malate and 2-hydroxyglutarate (2HG) levels (A; n=3) and ratios of  $\alpha$ KG to suc and of  $\alpha$ KG to 2HG (B; n=3) in cells treated with vehicle (veh; control) or 10 $\mu$ M Myxothiazol (Myx) for 3 days.

(C) Histogram showing total DNA methylation and 5hmC signal among all 282,160 CpGs investigated.

(D) 5hmC levels in the 70,325 CpGs showing a 5hmC signal.

(E) Schematic representation of the metabolic adaptations upon ETC inhibition that result in increased levels of succinate and 2HG relative to  $\alpha$ KG, which may induce TET activity that results in preservation of SSPC properties. Glutamine-derived  $\alpha$ KG is converted to 2HG by malate dehydrogenase (MDH) or metabolized in the TCA cycle to succinate. Succinate cannot be further converted to fumarate as succinate dehydrogenase (SDH) is indirectly blocked by ETC complex III inhibition. Glucose-derived pyruvate enters the TCA cycle via pyruvate carboxylase (PC) and is further converted by MDH to malate and then by reverse SDH to succinate. Aspartate is also converted to succinate by the same pathway.

Data are means  $\pm$  SD. \*p<0.05, \*\*p<0.01, \*\*\*\*p<0.0001 vs veh (two-tailed Student's *t*-test).

**Table S1: List of chemicals. Related to STAR Methods: cell culture, treatment conditions.**

| <b>Compounds</b>   | <b>Supplier</b> | <b>Catalog number</b> | <b>Concentration</b> |
|--------------------|-----------------|-----------------------|----------------------|
| AKB                | Sigma-Aldrich   | Cat# K401             | 1mM                  |
| Antimycin A        | Sigma-Aldrich   | Cat# A8674            | 10µM                 |
| Aspartate          | Sigma-Aldrich   | Cat# A9256            | 0.2mM                |
| Atpenin A5         | Enzo            | Cat# ALX-380-313      | 500nM                |
| FK866              | Sigma-Aldrich   | Cat# F8557            | 10nM                 |
| L-Ascorbic Acid    | Sigma-Aldrich   | Cat# A4544            | 0.5mM                |
| Myxothiazol        | Sigma-Aldrich   | Cat# T5580            | 10µM                 |
| Nucleoside mixture | merck millipore | Cat# ES-008-D         | x1                   |
| Cytidine           | -               | -                     | 0.73g/L              |
| Guanosine          | -               | -                     | 0.85g/L              |
| Uridine            | -               | -                     | 0.73g/L              |
| Adenosine          | -               | -                     | 0.8g/L               |
| Thymidine          | -               | -                     | 0.24g/L              |
| Pyruvate           | Gibco           | Cat# 11360-039        | 1mM                  |

**Table S2: List of oligonucleotides. Related to STAR Methods: RNA extraction and qRT-PCR.**

| Short hairpins sequences |                                                            |                                 |                               |
|--------------------------|------------------------------------------------------------|---------------------------------|-------------------------------|
| gene                     | Sequence                                                   |                                 |                               |
| <i>shMdh2</i>            | CCGGCGGAATGCACTTACTTCTCTACTCGAGTAGAGAAGTAAGTGCATTCCGTTTTTG |                                 |                               |
| qRT-PCR primers          |                                                            |                                 |                               |
| gene                     | forward primer                                             | probe                           | reverse primer                |
| <i>Alp</i>               | CGCACGCGATGCAACA                                           | CACTCAGGGCAATGAGGTCACATCCA      | CGGACTTCCCAGCATCCTT           |
| <i>Coll1a1</i>           | TGTCCCAACCCCAAAGAC                                         | ACGTATTCTTCCGGGCAGAAAGCACA      | CCCTCGACTCCTACATCTTCTGA       |
| <i>Coll2a1</i>           | AGAACATCACCTACCACTGTAAGAAC<br>A                            | CCTTGCTCATCCAGGGCTCCAATG        | TGACGGTCTTGCCCCACTT           |
| <i>Mdh2</i>              | GAAGGAGTCGTTGAGTGTTCTT                                     | -                               | CCAATGCCCAGGTTCTTCT           |
| <i>Nampt</i>             | TGG TTA CAG AGG AGT CTC TTC G                              | -                               | AAG CCG TTA TGG TAC TGT GC    |
| <i>Pcx</i>               | TGAGGCTCCTGGGTGTC                                          | -                               | GATGGCAATCTCACCTCTGTT         |
| <i>Ppary</i>             | CCCAATGGTTGCTGATTACAAA                                     | CTGAAGCTCCAAGAATACCAAAGTGCGATC  | AATAATAAGGTGGAGATGCAGGTT<br>T |
| <i>Runx2</i>             | TACCAGCCACCGAGACCAA                                        | CTTGTGCCCTCTGTTGTAAATACTGCTTGCA | AGAGGCTGTTTGACGCCATAG         |
| <i>Sox9</i>              | TCTGGAGGCTGCTGAACGA                                        | CAGCACAAGAAAGACCACCC            | TCCGTTCTTCACCGACTTCCT         |
| <i>Tet1</i>              | CAGCCGTTGAAATACATGCTC                                      | -                               | ACATCCCACAGACCGAAGA           |
| <i>Tet2</i>              | AGAGCCTCAAGCAACCAAAA                                       | -                               | ACATCCCTGAGAGCTCTTGC          |
| <i>Tet3</i>              | CCTTTTCTCCATACCGATCCTC                                     | -                               | GAGTTCCTACCTGCGATTG           |

**Table S3: List of antibodies used for immunofluorescence and flow cytometry analysis. Related to STAR Methods: Western blot, Flow cytometry analysis and cell sorting.**

|                             | Antigen/reagent             | Host   | Conjugate                 | Supplier                  | Catalog number | Dilution |
|-----------------------------|-----------------------------|--------|---------------------------|---------------------------|----------------|----------|
| <b>Primary antibodies</b>   | 5hmc                        | Rabbit | -                         | Active Motif              | 39769          | 1/10000  |
|                             | AMPK $\alpha$               | Rabbit | -                         | Cell Signaling Technology | 2532           | 1/1000   |
|                             | $\beta$ -actin              | Mouse  | -                         | Sigma-Aldrich             | A5441          | 1/10000  |
|                             | BP1                         | Rat    | PE                        | eBioscience               | 12-5891-81     | 1/200    |
|                             | CD31                        | Rat    | -                         | BD Biosciences            | 550274         | 1/50     |
|                             | CD31                        | Rat    | APC                       | eBioscience               | 17-0311-80     | 1/500    |
|                             | CD45                        | Rat    | APC                       | eBioscience               | 17-0451-83     | 1/500    |
|                             | CD51                        | Rat    | Biotin                    | eBioscience               | 13-0512-82     | 1/200    |
|                             | CD90.2                      | Rat    | PE                        | eBioscience               | 12-0903-81     | 1/200    |
|                             | CD105                       | Rat    | PE                        | eBioscience               | 12-1051-81     | 1/40     |
|                             | CD200                       | Rat    | PerCP-eFluor 710          | eBioscience               | 46-5200-82     | 1/200    |
|                             | HIF1 $\alpha$               | Rabbit | -                         | Novus Biologicals         | NB100-449      | 1/1000   |
|                             | GFP                         | Rabbit | -                         | Invitrogen                | A11122         | 1/200    |
|                             | Histone H3                  | Rabbit | -                         | Cell Signaling Technology | 4499           | 1/2000   |
|                             | Histone H3 (di methyl K9)   | Rabbit | -                         | Abcam                     | ab176882       | 1/1000   |
|                             | Histone H3 (tri methyl K27) | Rabbit | -                         | Abcam                     | ab192985       | 1/1000   |
|                             | Histone H3 (di methyl K79)  | Rabbit | -                         | Abcam                     | ab3594         | 1/1000   |
|                             | Lamin A/C                   | Goat   | -                         | Santa Cruz                | sc-6215        | 1/1000   |
|                             | Mdh2                        | Rabbit | -                         | Abcam                     | ab96193        | 1/1000   |
|                             | Osterix                     | Rabbit | -                         | Santa Cruz                | sc-22536-R     | 1/10000  |
| PC                          | Rabbit                      | -      | Invitrogen                | PA5-50101                 | 1/1000         |          |
| Phospho-AMPK $\alpha$       | Rabbit                      | -      | Cell Signaling Technology | 2535                      | 1/1000         |          |
| Ter119                      | Rat                         | APC    | eBioscience               | 17-5921-83                | 1/200          |          |
| <b>Secondary antibodies</b> | anti-Goat                   | Rabbit | HRP                       | Dako                      | P0160          | 1/5000   |
|                             | anti-Mouse                  | Rabbit | HRP                       | Dako                      | P0161          | 1/5000   |
|                             | anti-Rabbit                 | Goat   | Alexa 546                 | Invitrogen                | A11010         | 1/200    |
|                             | anti-Rabbit                 | Goat   | Alexa 488                 | Invitrogen                | A11008         | 1/200    |
|                             | anti-Rabbit                 | Goat   | HRP                       | Dako                      | P0448          | 1/5000   |
|                             | anti-Rat                    | Goat   | Biotin                    | BD Biosciences            | 559286         | 1/100    |
|                             | Streptavidin                | -      | PE-Cyanine7               | eBioscience               | 25-4317-82     | 1/200    |
